# Supplementary material for: Structural Analysis of the SANT/Myb Domain of FLASH and YARP Proteins and Their Complex with the C-Terminal Fragment of NPAT by NMR Spectroscopy and Computer Simulations
Source: MDPI journal article supplement (doi:10.3390/ijms21155268), 2020-07-24
Supplement: s1 [file s1]

|       |    |    |    |    |           |           |           |           |           |           |           |           |           |           |           |           |           |           |           |           |           |           |           |           |           |           |           |           |      |      |
|-------|----|----|----|----|-----------|-----------|-----------|-----------|-----------|-----------|-----------|-----------|-----------|-----------|-----------|-----------|-----------|-----------|-----------|-----------|-----------|-----------|-----------|-----------|-----------|-----------|-----------|-----------|------|------|
| FLASH |    | ↓  | ↓↓ | ↓  |           |           |           | ↓         | ↓↓        | ↓↓        | ↓         |           |           |           |           |           |           |           |           |           |           |           |           |           |           |           |           |           |      |      |
| 1923  | GE | II | LW | TR | <u>ND</u> | <u>DR</u> | <u>IL</u> | <u>EC</u> | <u>QK</u> | <u>RG</u> | <u>PS</u> | <u>FK</u> | <u>TF</u> | <u>AY</u> | <u>LA</u> | <u>AK</u> | -         | <u>DK</u> | <u>NP</u> | <u>NQ</u> | <u>VS</u> | <u>ER</u> | <u>FQ</u> | <u>QL</u> | <u>MK</u> | <u>LF</u> | <u>EK</u> | <u>SK</u> | CR   | 1982 |
|       | GE | ++ | LW | TR |           | DR        | IL        | CQ        | ++        | G         |           | +         | TF        | ++        | +         | L         | +         | K         | P         | +         | VS        | RF        | ++        | LM        | +         | LF        |           | +         |      |      |
| 2149  | GE | KV | VL | WT | <u>RE</u> | <u>AD</u> | <u>RV</u> | <u>IL</u> | <u>TM</u> | <u>CQ</u> | <u>EQ</u> | <u>GA</u> | <u>QP</u> | <u>QT</u> | <u>FN</u> | <u>IS</u> | <u>QQ</u> | <u>LG</u> | <u>NK</u> | <u>TP</u> | <u>AE</u> | <u>VS</u> | <u>HR</u> | <u>FR</u> | <u>EL</u> | <u>MQ</u> | <u>LF</u> | <u>HT</u> | ACEA | 2209 |
| YARP  |    |    |    |    |           |           | ↑↑        | ↑↑        | ↑↑        |           |           |           |           |           |           |           |           |           |           |           |           | ↑↑        | ↑↑        | ↑↑        | ↑↑        |           |           | ↑↑        |      |      |
